# Supplementary material
Source: PubMed Central journal article supplement (PMC4467375)

Supplementary Figure 1

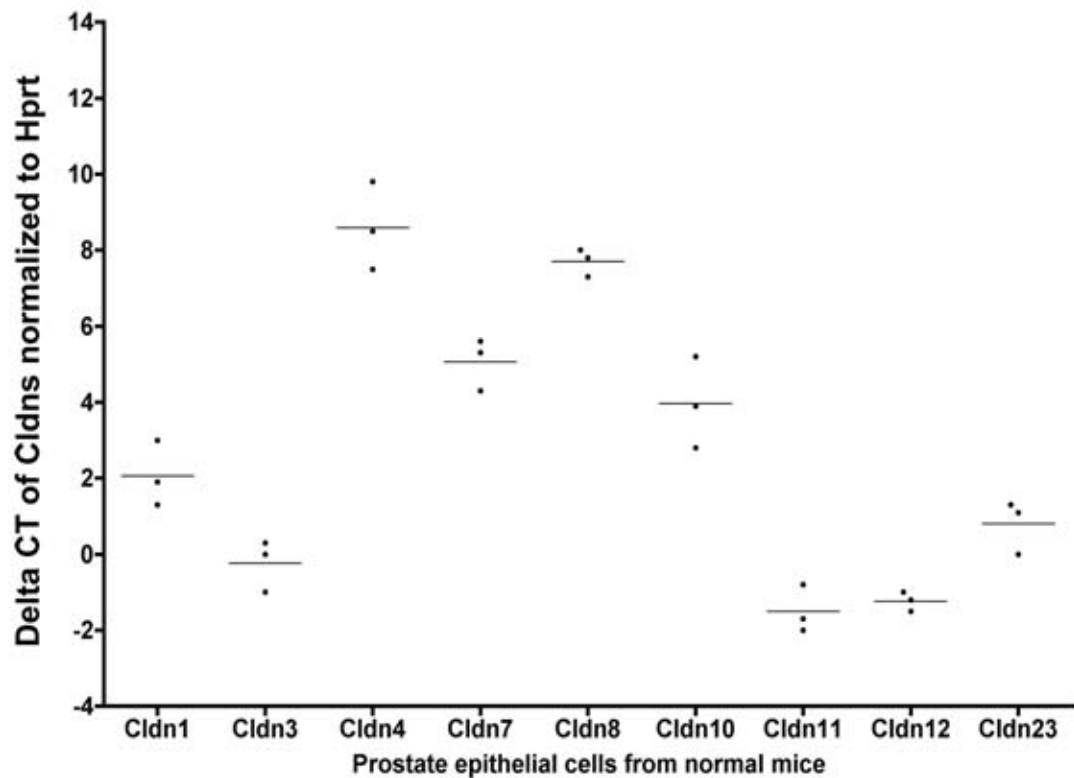

## Supplementary Figure 2

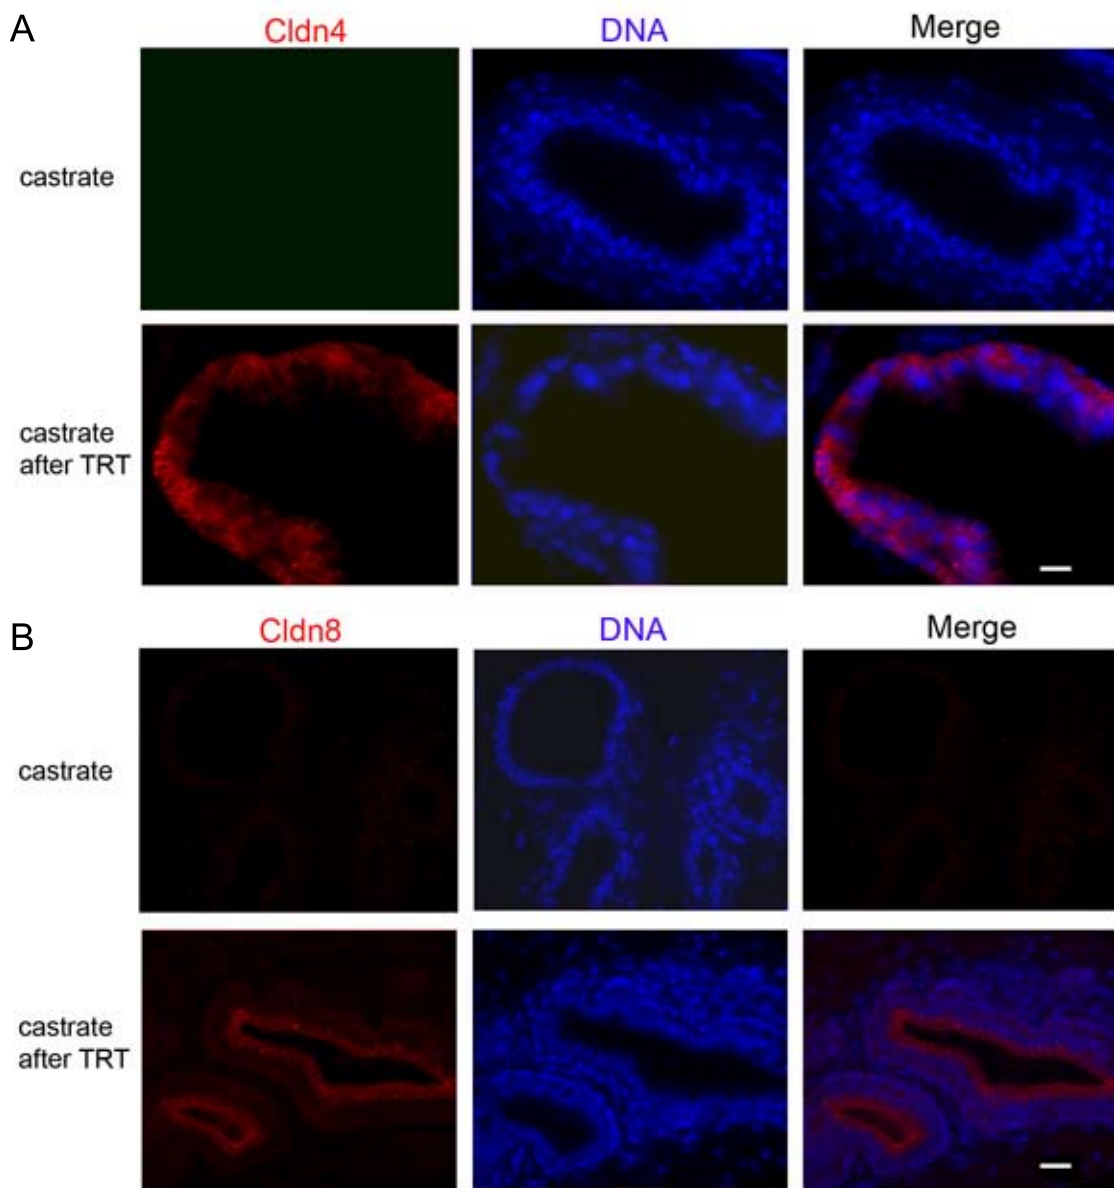

Supplementary Figure 3

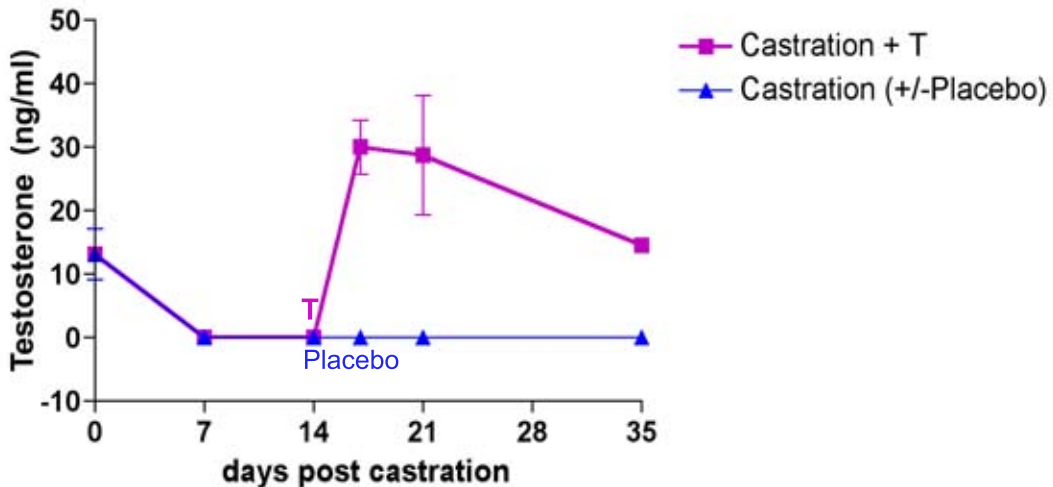

Supplement: NIHMS693653-supplement-01.pdf [file NIHMS693653-supplement-01.pdf]
